# Supplementary material for: In-site coupling of NiFe layered double hydroxides with N-doped carbon nanosheets on carbon cloth as integrated cathode for rechargeable Zn–air batteries
Source: Royal Society of Chemistry journal article supplement (doi:10.1039/d2ce01081j), 2022-01-01
Supplement: d2ce01081j1.pdf [file d2ce01081j1.pdf]

## Supporting Information

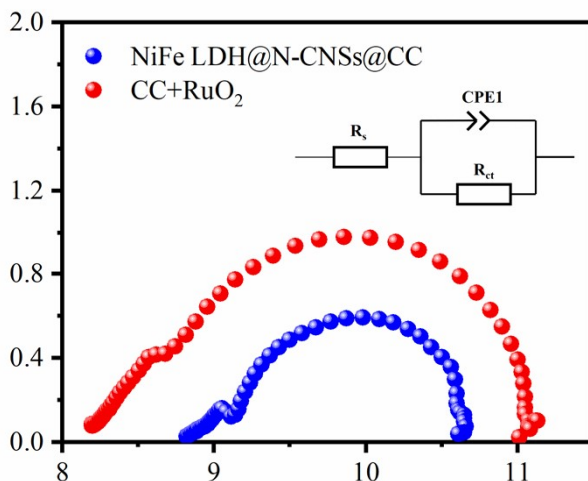

**Figure S1.** EIS Nyquist plots of NiFe LDH@N-CNSs@CC and Pt/C electrodes at a constant voltage of 1.6V vs RHE.

**Figure S1** shows the EIS Nyquist plots of different electrodes under the same test environment, and the equivalent circuit to simulate the electrochemical system is shown in the inset figure. Especially, the  $R_s$  represents the solution resistance and  $R_{ct}$  means interfacial charge-transfer resistance. As can be seen from the figure, although the solution resistance  $R_s$  of NiFe LDH@N-CNSs@CC electrode (8.9  $\Omega$ ) is bigger than that of RuO<sub>2</sub> electrode (8.3  $\Omega$ ), the interface transfer resistance  $R_{ct}$  of NiFe LDH@N-CNSs@CC (1.8  $\Omega$ ) is smaller than that of RuO<sub>2</sub> (2.9  $\Omega$ ).

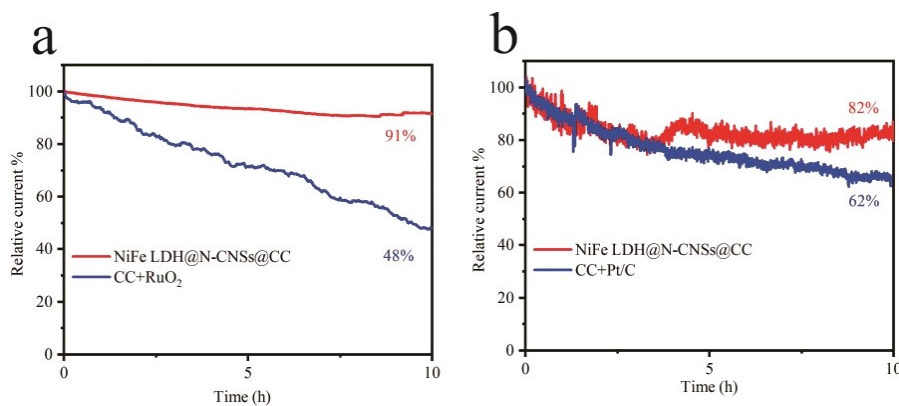

**Figure S2.** OER (a) and ORR (b) stabilities of NiFe LDH@N-CNSs@CC and commercial RuO<sub>2</sub> and Pt/C electrode measured at 1.6V vs RHE and 0.69V vs RHE.

---

Time-Current curves were measured to characterize the OER and ORR stability of NiFe LDH@N-CNSs@CC and commercial RuO<sub>2</sub> and Pt/C materials. Performing the i-t-ORR test requires a continuous flow of oxygen into the electrolyte, which is not required during the i-t-OER test. As can be seen, NiFe LDH@N-CNSs@CC showed only 9% decrease in OER current density after 10 h and 18% decrease in ORR current density after 10 h, indicating good electrochemical stability.
